# Supplementary material for: Syngas production: diverse H2/CO range by regulating carbonates electrolyte composition from CO2/H2O via co-electrolysis in eutectic molten salts
Source: Royal Society of Chemistry journal article supplement (doi:10.1039/c7ra07320h), 2017-01-01
Supplement: c7ra07320h1.pdf [file c7ra07320h1.pdf]

SUPPORTING INFORMATION

# Syngas Production: Diverse H<sub>2</sub>/CO Range by Regulating Carbonates Electrolyte Composition from CO<sub>2</sub>/H<sub>2</sub>O via Co-Electrolysis in Eutectic Molten Salts

Received 00th January 20xx,  
Accepted 00th January 20xx

DOI: 10.1039/x0xx00000x

www.rsc.org/

Yue Liu,<sup>a,1</sup> Dandan Yuan,<sup>a,1</sup> Deqiang Ji,<sup>a</sup> Zhida Li,<sup>a</sup> Zhonghai Zhang,<sup>b</sup> Baohui Wang,<sup>a</sup> Hongjun Wu,<sup>a,\*</sup>

## Results and discussion - Supporting Information

°C, 525 °C, 550 °C, 575 °C, and 600 °C in the electrolyte of the Li<sub>1.51</sub>K<sub>0.49</sub>CO<sub>3</sub>-0.1LiOH system.

The products trend in Li<sub>1.51</sub>K<sub>0.49</sub>CO<sub>3</sub>-0.1LiOH electrolyte is observed from Fig. S1. The CO content at all temperatures decreases significantly with voltage changes in the range of 1.6-2.6 V, as evident by Fig. S1. For example, at 550 °C, the CO content decreases from 52% at 1.6 V to 21% at 2.6 V, and the result shows that at the same temperature, an increase of electrolysis is not conducive to the generation of CO. Specifically, 1.6 V results in the best electrolysis of the Li - K system at each temperature.

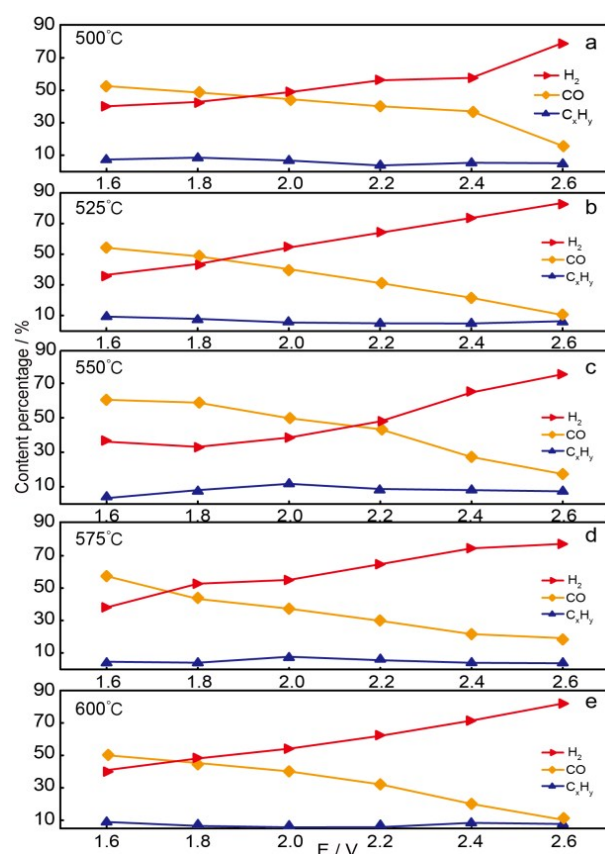

Fig. S1: Compositions of the electrolysis gaseous products in the operating voltage range from 1.6 V to 2.6 V at temperatures of 500

<sup>a</sup>, Provincial Key Laboratory of Oil & Gas Chemical Technology, College of Chemistry & Chemical Engineering, Northeast Petroleum University, Daqing 163318, China.

<sup>b</sup>, Department of Chemistry, East China Normal University, 500 Dongchuan Road, Shanghai, 200241, China.

\* Corresponding author, E-mail: [hjwu@nepu.edu.cn](mailto:hjwu@nepu.edu.cn); [hjwu1979@163.com](mailto:hjwu1979@163.com).

1. The two authors contributed equally to this paper.

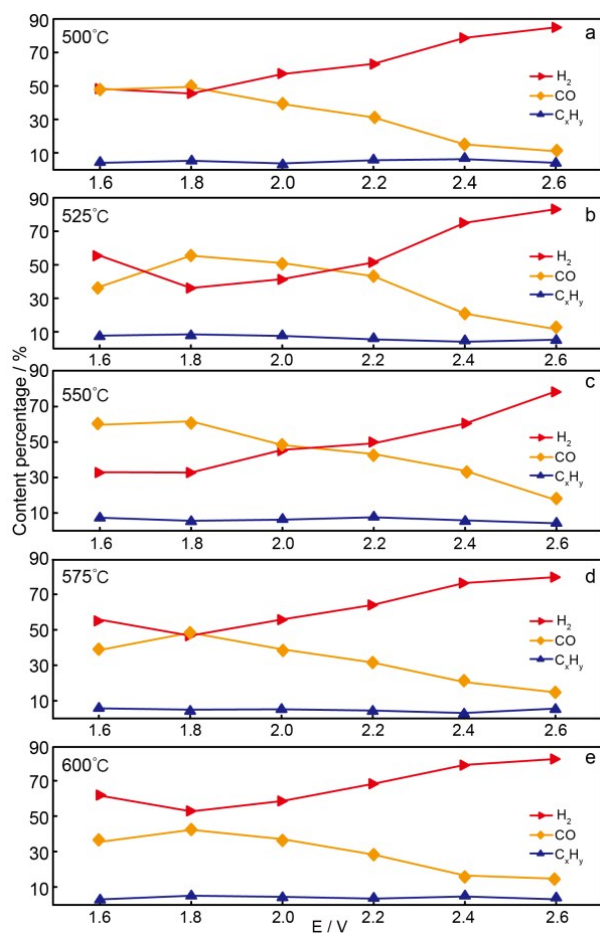

**Fig. S2:** Compositions of the electrolysis gaseous products in the operating voltage range from 1.6 V to 2.6 V at temperatures of 500 °C, 525 °C, 550 °C, 575 °C, and 600 °C in the electrolyte of the Li<sub>1.43</sub>Na<sub>0.36</sub>K<sub>0.21</sub>CO<sub>3</sub>-0.1LiOH system.

**Fig. S2** shows the H<sub>2</sub>, CO and C<sub>x</sub>H<sub>y</sub> content in the Li-Na-K ternary system with various electrolytic conditions. When the temperature change is in the range of 500-550 °C, at each temperature, there is a similar trend among the content of each product. The yield of CO increases with an increasing applied voltage (1.6-1.8 V), and when the voltage continued to increase (1.8-2.6 V), the CO content begins to decrease. When electrolysis with 1.8 V voltage, the optimum CO fraction is obtained.

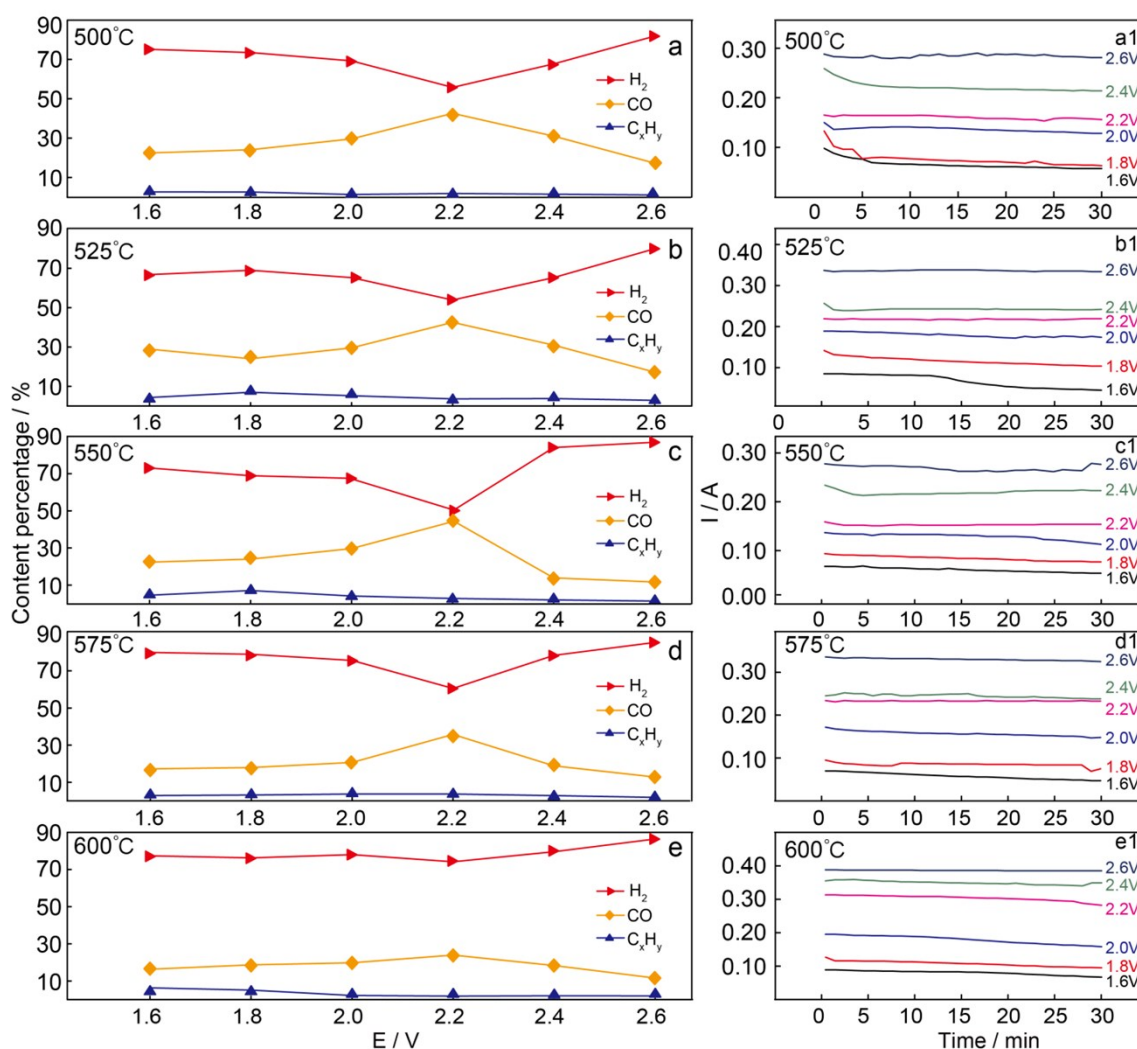

**Fig. S3:** Compositions of the electrolysis gaseous products and I-t curves of the electrolytic system in the operating voltage range from 1.6 V to 2.6 V at temperatures of 500 °C, 525 °C, 550 °C, 575 °C, and 600 °C in the electrolyte of the  $\text{Li}_{0.85}\text{Na}_{0.61}\text{K}_{0.54}\text{CO}_3\text{-}0.1\text{LiOH}$  system.

**Fig. S3** presents the yield of each gaseous product in the  $\text{Li}_2\text{CO}_3\text{-Na}_2\text{CO}_3\text{-K}_2\text{CO}_3$  system with a mass ratio of 31:32:37. When the temperature is in the range of 500–600 °C, a low yield of CO is obtained at 1.6 V. This observation can be explained because 1.6 V is an insufficient voltage for CO generation. When the cell voltage increases to 1.8 V, the enlarged voltage leads to an enhanced current density. At 2.2 V, the current is elevated to approximately 0.16 A at 550 °C, which can guarantee the electrochemical reactions proceeded facily. At 2.4 V and 2.6 V, the steady larger current results in a relatively lower current efficiency, as shown in **Fig. 10d**. This is due to the increasing current of the electrolyte at the voltage of 2.4–2.6 V, which increases the power consumption in the same

time, resulting in a decrease in current efficiency. Therefore, 2.2 V is always the best electrolysis voltage in the temperature range of 500–600 °C.
